1 **The plastid-nucleus located DNA/RNA binding protein WHIRLY1**  
2 **regulates microRNA-levels during stress**

3

4 Aleksandra Swida-Barteczka<sup>2</sup>, Anja Krieger-Liszkay<sup>3</sup>, Wolfgang Bilger<sup>1</sup>, Ulrike Voigt<sup>1</sup>, Götz  
5 Hensel<sup>4</sup>, Zofia Szweykowska-Kulinska<sup>2</sup>, Karin Krupinska<sup>1</sup>

6

7 <sup>1</sup> Institute of Botany, Christian-Albrechts-University, Kiel, Germany

8 <sup>2</sup> Department of Gene Expression, Institute of Molecular Biology and Biotechnology, Faculty  
9 of Biology, Adam Mickiewicz University in Poznan, Poznan, Poland

10 <sup>3</sup> Institute for Integrative Biology of the Cell, Commissariat à l’Energie Atomique et aux  
11 Energies Alternatives Saclay, Centre National de la Recherche Scientifique, Université Paris-  
12 Sud, Université Paris-Saclay, 91191 Gif-sur-Yvette, France

13 <sup>4</sup> Leibniz Institute of Plant Genetics and Crop Plant Research (IPK), Seeland/Gatersleben,  
14 Germany

15

16

17

18 In this article a novel mechanism of retrograde signaling by chloroplasts during stress is  
19 described. This mechanism involves the DNA/RNA binding protein WHIRLY1 as a regulator  
20 of microRNA levels. By virtue of its dual localization in chloroplasts and the nucleus of the  
21 same cell, WHIRLY1 was proposed as an excellent candidate coordinator of chloroplast  
22 function and nuclear gene expression (Grabowski et al., 2008; Foyer et al., 2014). In this  
23 study the putative involvement of WHIRLY1 in stress dependent retrograde signaling was  
24 investigated by comparison of barley (*Hordeum vulgare* L., cv. Golden Promise) wild-type  
25 and transgenic plants with an RNAi-mediated knockdown of *WHIRLY1*. In contrast to the  
26 wild type, the transgenic plants were unable to cope with continuous high light conditions.  
27 They were impaired in production of several microRNAs mediating post-transcriptional  
28 responses during stress (Kruszka et al., 2012, Sunkar et al., 2012). The results support a  
29 central role of WHIRLY1 in retrograde signaling and underpin a so far underestimated role of  
30 microRNAs in this process.

31

32 WHIRLY1 belongs to a small plant specific family of DNA/RNA-binding proteins. By  
33 immunological methods, WHIRLY1 has been detected in chloroplasts and the nucleus of the  
34 same cell (Grabowski et al., 2008). Accordingly, functions of WHIRLY1 were reported for

35 both compartments. In chloroplasts of barley, WHIRLY1 was shown to be the major  
36 compacting protein of nucleoids (Krupinska et al., 2014). Moreover, WHIRLY1 has been  
37 found to bind to plastid RNAs (Melonek et al., 2010; Prikryl et al., 2008). In chloroplasts of  
38 *Arabidopsis thaliana*, WHIRLY1 was reported to maintain plastid genome stability (Maréchal  
39 et al., 2009). In the nucleus, WHIRLY1 was originally detected as a component of a  
40 transcriptional activator of the *PRI0a* gene of potato (Desveaux et al., 2000). Furthermore, it  
41 has been found to bind to telomeres (Yoo et al., 2007).

42 Chloroplasts act as sensors of the environmental situation and produce diverse signals  
43 informing about the functionality of the photosynthetic apparatus (Pfalz et al., 2012, Kleine  
44 and Leister, 2016). These retrograde signals comprise redox changes and reactive oxygen  
45 species and regulate gene expression in the nucleus in particular during stress situations  
46 (Dietz, 2015). Although in recent years several compounds involved in chloroplast-to-nucleus  
47 communication have been identified, the full repertoire of molecular mechanisms adjusting  
48 nuclear gene expression to environmental cues remains obscure (Chan et al., 2016).

49 To investigate the impact of WHIRLY1 on stress resistance of barley plants, seedlings of  
50 three independent transgenic lines with an RNAi-mediated knockdown of *WHIRLY1* (RNAi-  
51 W1-1, RNAi-W1-7 and RNAi-W1-9) were grown in continuous light at four different  
52 irradiances (50, 120, 200, 350  $\mu\text{mol photons m}^{-2} \text{s}^{-1}$ ). Leaves had reduced levels of the  
53 WHIRLY1 protein ranging from undetectable traces (RNAi-W1-7) to 10% of the wild-type  
54 level (RNAi-W1-1, RNAi-W1-9) (Krupinska et al., 2014). The reduction in length was the  
55 same in both lines having 10% the WHIRLY1. Therefore, only the results obtained for line  
56 W1-1 besides line W1-7 are presented in Figure 1. The reduction in leaf length occurred  
57 irrespective of the irradiance (Fig. 1A) indicating that WHIRLY1 has a general positive effect  
58 on growth.

59 Moreover the seedlings of the RNAi-W1 plants showed in contrast to the wild type bleaching  
60 and a reduction of the chlorophyll content at 200  $\mu\text{mol photons m}^{-2} \text{s}^{-1}$  (Fig. 1B). The  
61 reduction was more prominent in case of the RNAi-W1-7 line, having the lowest level of  
62 WHIRLY1 protein (Krupinska et al., 2014), as compared to the two other lines.

63 Analyses of carotenoids showed that in leaves of the RNAi-W1 plants the ratio of VAZ  
64 (V=violaxanthin, A=antheraxanthin, Z=zeaxanthin) pool pigments to chlorophylls was  
65 enhanced at irradiances of 200 and 350  $\mu\text{mol photons m}^{-2} \text{s}^{-1}$  (Fig. 1C). The enhanced ratio of  
66 VAZ/chlorophyll in the RNAi-W1 plants coincided with a higher de-epoxidation state of the

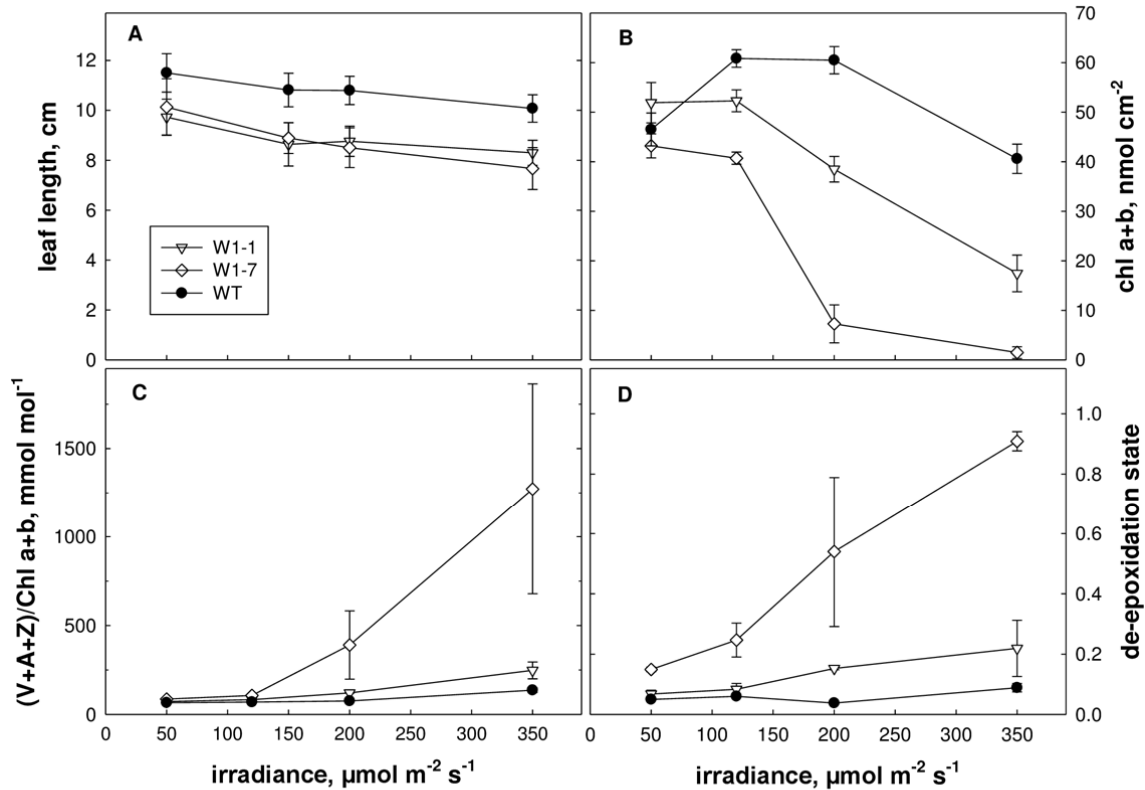

**Figure 1.** Characterization of *WHIRLY1* knockdown lines at the seedling stage. Seedlings were exposed to continuous irradiation at 50, 120, 200 or 350  $\mu\text{mol photons m}^{-2} \text{s}^{-1}$  for 7 days. Lengths of the primary leaves (cm) are indicated (A). Pigment extracts from the wild type (WT) and the RNAi-W1 lines (W1-1, W1-7) were compared by HPLC for the content of chlorophylls/leaf area (B), the ratio of xanthophyll cycle pigments (VAZ) to chlorophyll (C) and the de-epoxidation state of VAZ (D). De-epoxidation state was calculated as  $(Z+0.5A)/(V+A+Z)$ . All data are means of 3 samples, error bars denote standard deviation. The results obtained for lines RNAi-W1-1 and RNAi-W1-9 are similar. Only the results of RNAi-W1-1 are therefore shown.

67 VAZ pool (Fig. 1D) indicating synthesis of zeaxanthin from violaxanthin. In line RNAi-W1-7  
 68 with the most extreme knockdown of *WHIRLY1*, the alterations were more dramatic than in  
 69 line RNAi-W1-1. At low light, no differences were detected between wild type and RNAi-W1  
 70 plants indicating that the alterations in the pigment composition are due to high light stress.

71 Zeaxanthin is known to have the highest antioxidative capacity of the xanthophylls and might  
 72 protect thylakoid membrane lipids from oxidation (Havaux et al., 2007). Besides its direct  
 73 effect as ROS scavenger, zeaxanthin plays an important role in non-photochemical quenching  
 74 dissipating excess energy as heat and avoiding thereby the production of reactive oxygen  
 75 species (Li et al., 2009). The enhanced de-epoxidation of the xanthophyll cycle pigments in  
 76 the RNAi-W1 plants compared to the wild type therefore indicates that their photosynthetic  
 77 apparatus absorbed more light than required for assimilation of carbon. ROS production by  
 78 thylakoids from RNAi-W1 or from wild-type seedlings grown at 200  $\mu\text{mol photons m}^{-2} \text{s}^{-1}$   
 79 was measured by electron paramagnetic spin resonance (EPR). Indirect spin trapping of  
 80 superoxide/hydrogen peroxide using 4-POBN/ethanol/FeEDTA (Mubarakshina et al., 2010)

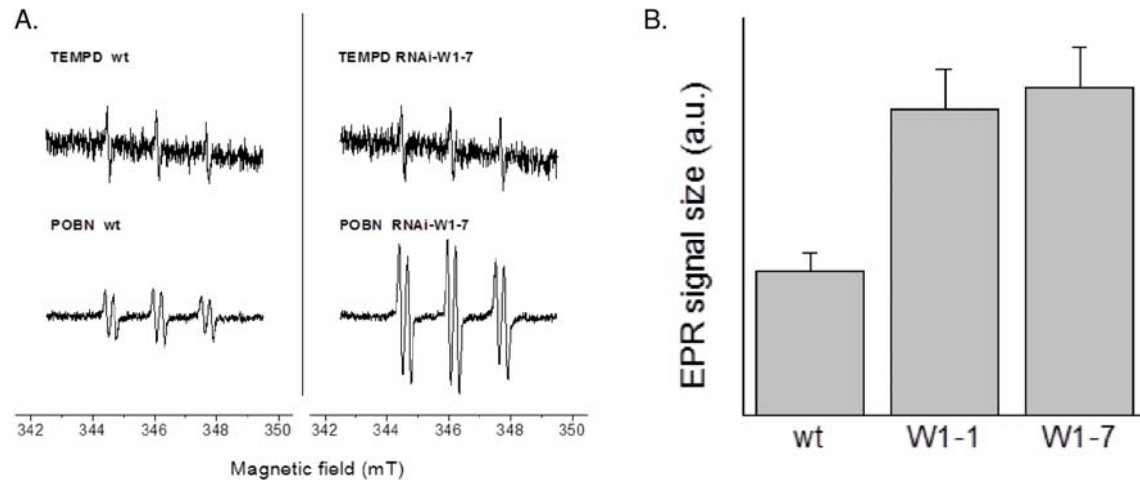

**Figure 2.** ROS production by thylakoids from wild type and RNAi-W1-1 and RNAi-W1-7 lines. Thylakoids were prepared from seedlings grown in continuous light of  $200 \mu\text{mol photons m}^{-2}\text{s}^{-1}$ . Superoxide/Hydrogen peroxide levels measured by spin trapping EPR using 4-POBN/EtOH/FeEDTA as spintrap assay and singlet oxygen by the spin probe TEMPD-HCl (for experimental details, see Krieger-Liszkay et al., 2015). Thylakoids were illuminated for 2 min with red light ( $500 \mu\text{mol quanta m}^{-2}\text{s}^{-1}$ ) in the presence of the spintraps. Left: representative spectra, right: Size of the EPR signals (4-POBN/EtOH/FeEDTA) were normalized to the signal obtained in wild-type thylakoids (mean  $\pm$  SD,  $n=6$ ).

81 showed that RNAi-W1 thylakoids generated in the light about two times larger signals as  
82 wild-type thylakoids (Fig. 2A, B). To investigate whether also singlet oxygen production by  
83 thylakoids is enhanced in WHIRLY1 deficient chloroplasts, EPR measurements were  
84 performed with the specific spin probe TMPD (Krieger-Liszkay et al., 2015). Using TMPD as  
85 spin trap, no difference was observed between the wild type and the transgenic lines (Fig.  
86 2A).

87 Taken together, analyses of pigments as well as ROS measurements revealed that the  
88 WHIRLY1 deficient plants experienced more photooxidative stress than the wild type when  
89 grown in continuous high light. This indicates that WHIRLY1, in addition to its positive  
90 effect on growth, also promotes stress resistance.

91 Since WHIRLY1 in chloroplasts was shown to bind to RNA as well as to DNA (Melonek et  
92 al., 2010) it was obvious to investigate a putative role of WHIRLY1 in controlling the levels  
93 of microRNAs which play a central role in the control of plant development as well as in  
94 stress responses (Kruszka et al., 2012; Li et al., 2016). For the analysis of microRNAs,  
95 primary foliage leaves of wild-type plants and plants of the RNAi-W1-7 line, respectively,  
96 grown either at low light ( $100 \mu\text{mol photons m}^{-2} \text{s}^{-1}$ ) or at high light ( $350 \mu\text{mol photons m}^{-2}$   
97  $\text{s}^{-1}$ ), were used. Eight conserved microRNAs reported to be stress responsive in *Arabidopsis*  
98 *thaliana* (Barciszweska et al., 2015) were selected and their levels were determined by  
99 Northern blot analyses as well as by RT-qPCR TaqMan MicroRNA assays.

100 In wild-type plants the levels of most of these microRNAs were enhanced at high light  
101 compared to low light conditions (Supplemental Fig. S1). These findings were confirmed by  
102 RT-qPCR TaqMan MicroRNA assays, although the changes were not statistically significant  
103 in each case (Fig. 3A). While in Northern blot analyses at least several members of a  
104 microRNA family were detected (Supplemental Fig. S1), in RT-qPCR TaqMan MicroRNA  
105 assays only specific members of a family were measured. Therefore the results of both  
106 approaches are not always directly comparable, e.g. in case of miRNA159.

107 For all microRNAs tested in Northern blot hybridization the levels were reduced in leaves of  
108 the two RNAi-W1 lines (RNAi-W1-1 and RNAi-W1-7) (Supplemental Fig. S1). These results  
109 were confirmed by RT-qPCR TaqMan MicroRNA assays and were independent of the light  
110 conditions (Supplemental Fig. S2A, B).

111 Some mRNA targets for the tested microRNAs are known in several plant species including  
112 barley (Supplemental Table 1). Additional missing target mRNAs in barley were identified  
113 using the psRNA-Target software (Dai and Zhao, 2011;  
114 <http://plantgrn.noble.org/psRNATarget/>) (Supplemental Material S2). MicroRNAs hvu-  
115 miR159a and hvu-miR159b-3p potentially target *GAMyb* mRNA, and microRNAs named  
116 hvu-miR164a, hvu-miR172b-3p, hvu-miR393h and hvu-miR396b-5p target *NAC*, *APETALA*,  
117 *TIR1* and *GRF1* mRNAs, respectively. Barley *HOX9* and *AGO1* mRNAs have been shown  
118 experimentally to be targets of microRNA166a and microRNA168-5p, respectively (Kruszka  
119 et al., 2014, Pacak et al., 2016).

120 The effects of the selected miRNAs on the levels of targeted mRNAs were tested by qRT-  
121 PCR. In primary foliage leaves of wild-type plants grown in high light, the upregulation of  
122 microRNAs coincided with a downregulation of targeted mRNAs (Fig. 3B). In contrast, in the  
123 RNAi-W1 plants grown in high light most target gene mRNA levels are enhanced compared  
124 to the wild type (Fig. 3C) whereas at low light the levels of target gene mRNAs are similar  
125 between the wild type and RNAi-W1-7 plants (Supplemental Fig. S3).

126 The results indicate that high light induced signals from chloroplasts stimulate a WHIRLY1  
127 dependent downregulation of the level of mRNAs targeted by the tested microRNAs being  
128 upregulated in the wild type. In contrast to the wild type, plants of the RNAi-W1-7 line did  
129 neither show a light-induced increase in microRNAs nor a decrease in the mRNA levels of  
130 their target genes. This indicates that the WHIRLY1 deficient plants can't respond to stress  
131 and thereby suffer from a higher ROS production.

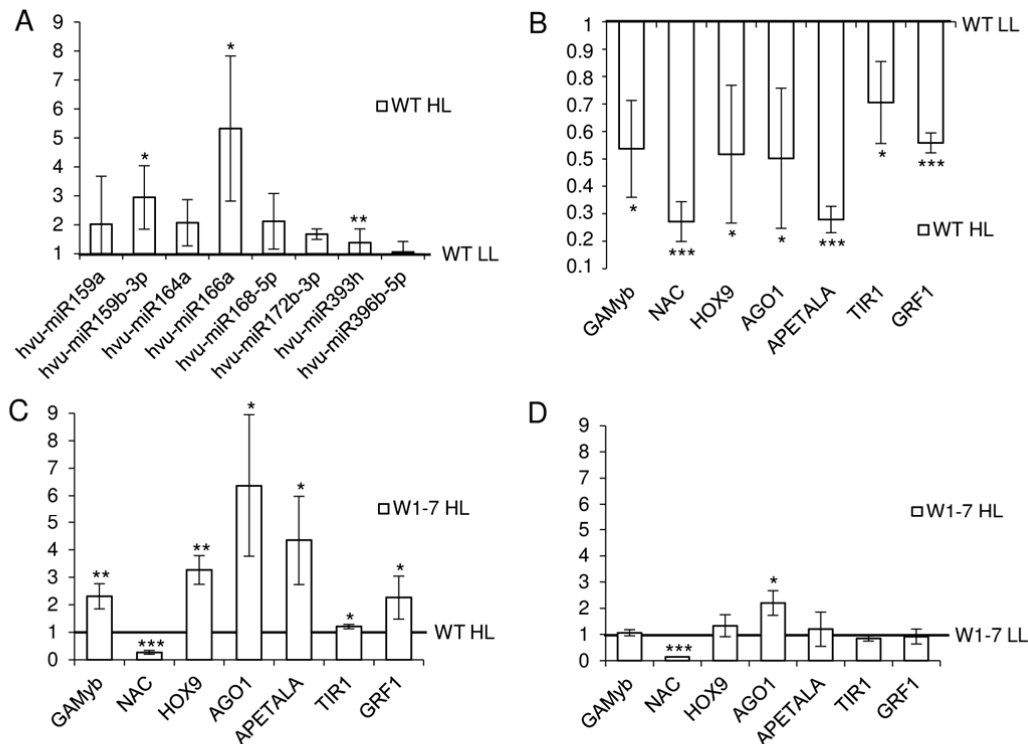

**Figure 3.** RT-qPCR analysis of microRNAs and target genes expression in wild type (WT) and transgenic RNAi -W1-7 plants exposed to either low (LL) or high light (HL). (A) In WT plants exposed to HL the levels of microRNAs were enhanced. Results are presented as fold change and results for WT plants grown in LL are treated as 1. (B) In the wild type plants HL lead to a downregulation of the levels of target mRNAs. (C) Levels of most target mRNAs were upregulated in high light treated W1-7 plants when compared to the WT. (D) Target mRNAs expression stayed mostly unchanged when RNAi-W1-7 plants exposed to LL and HL are compared. Error bars indicate SD (n=3), and the asterisk indicates a significant difference between the sample and control (t test, \*P<0.05, \*\*P<0.01, \*\*\*P<0.001).

132 In the transgenic plants grown either in low light or in high light, the levels of targeted  
 133 mRNAs did not show essential differences (Fig. 3D). The only exception is NAC  
 134 transcription factor mRNA ( GenBank: AK356223.1) that is downregulated in W1-7 high and  
 135 low light grown plants despite the low level of its potential cognate microRNA164a. The  
 136 reason for this result remains unclear. NAC transcription factors comprise one of the largest  
 137 gene families and are involved in the regulation of plant development, senescence and  
 138 response to various stresses. Their activities can be regulated at different levels (transcription  
 139 efficiency, alternative splicing, posttranslational regulation) that possibly might affect the  
 140 final level of NAC mRNAs (Shao et al., 2015).

141 WHIRLY1 has been proposed to move from the chloroplast to the nucleus in response to  
 142 environmental cues such as high light intensity (Foyer et al., 2014). In this study it has been  
 143 demonstrated that the repertoire of the plants' responses towards high light involves a  
 144 WHIRLY1 dependent increase in the levels of diverse nuclear microRNAs. As WHIRLY1

145 can bind to RNA it might be a general factor influencing the biogenesis and/or stability of  
146 microRNAs. The observed phenomenon might be caused either by direct binding of  
147 WHIRLY1 to the nuclear microRNAs and/or its architectural impact on nuclear chromatin as  
148 observed in chloroplasts (Krupinska et al., 2014). To elucidate the specific role of WHIRLY1  
149 in the regulation of the levels of microRNAs and targeted mRNAs during retrograde signaling  
150 further detailed studies are required.

151

## 152 **Acknowledgements**

153 We would like to thank Artur Jarmolowski (AMU Poznan, Poland) for fruitful discussions.  
154 Susanne Braun and Jens Hermann (CAU Kiel, Germany) are thanked for technical assistance.  
155 We thank the German Research Foundation (DFG: Kr1350/7, Kr1350/9), National Science  
156 Centre Poland (NSC UMO-2016/23/B/NZ9/00862), and the KNOW RNA Research Centre in  
157 Poznan 01/KNOW2/2014 for financial support.

158

159

160

161

162

163

## 164 **FIGURE LEGENDS**

165

166 Figure 1. Characterization of *WHIRLY1* knockdown lines at the seedling stage. Seedlings  
167 were exposed to continuous irradiation at 50, 120, 200 or 350  $\mu\text{mol photons m}^{-2} \text{s}^{-1}$  for 7 days.  
168 Lengths of the primary leaves (cm) are indicated (A). Pigment extracts from the wild type  
169 (WT) and the RNAi-W1 lines (W1-1, W1-7, W1-9) were compared by HPLC for the content  
170 of chlorophylls/leaf area (B), the ratio of xanthophyll cycle pigments (VAZ) to chlorophyll  
171 (C) and the de-epoxidation state of VAZ (D). De-epoxidation state was calculated as  
172  $(Z+0.5A)/(V+A+Z)$ . All data are means of three samples, error bars denote standard  
173 deviation. The results obtained for lines RNAi-W1-1 and RNAi-W1-9 are rather similar. Only  
174 the results of RNAi-W1-1 are therefore shown.

175

176 Figure 2. ROS production by thylakoids from wild type and RNAi-W1-1 as well as RNAi-  
177 W1-7 lines. Thylakoids were prepared from seedlings grown in continuous light of 200  $\mu\text{mol}$

178 photons  $\text{m}^{-1}\text{s}^{-1}$ . Superoxide/Hydrogen peroxide levels were measured by spin trapping EPR  
179 using 4-POBN/EtOH/FeEDTA as spintrap and singlet oxygen by the spin probe TEMPD-  
180 HCl (for experimental details, see Krieger-Liszkay et al., 2015). Thylakoids were illuminated  
181 for two minutes with red light ( $500 \mu\text{mol quanta m}^{-2}\text{s}^{-1}$ ) in the presence of the chemicals. Left:  
182 representative spectra, right: EPR signal sizes (4-POBN/EtOH/FeEDTA) were normalized to  
183 the signal obtained in wild-type thylakoids (mean  $\pm$  SD, n=6).

184

185 Figure 3. RT-qPCR analysis of microRNAs and target genes expression in wild type (WT)  
186 and transgenic RNAi -W1-7 plants exposed to either low (LL) or high light (HL). (A) In WT  
187 plants exposed to high light the levels of microRNAs were enhanced. Results are presented as  
188 fold change and results for WT plants grown in low light are treated as 1. (B) In the wild type  
189 plants high light lead to a downregulation of the levels of target mRNAs. (C) Levels of most  
190 target mRNAs were enhanced in high light treated W1-7 plants when compared to the wild  
191 type. (D) Target mRNAs expression stayed mostly unchanged when RNAi-W1-7 plants  
192 exposed to low and high light are compared. Error bars indicate SD (n=3), and the asterisk  
193 indicates a significant difference between the sample and control (t test, \* $P \leq 0.05$ , \*\* $P \leq 0.01$ ,  
194 \*\*\* $P \leq 0.001$ ).

195

196



197 **SUPPLEMENTAL DATA**

198

199 **Supplemental Figure S1.** Northern blot analysis of microRNA levels in low light (LL) and  
200 high light (HL) in wild type (WT) and WHIRLY1 deficient barley plants (RNAi-W1-1 and  
201 RNAi-W1-7).

202

203 **Supplemental Figure S2.** RT-qPCR analysis of microRNAs in wild type (WT) and  
204 transgenic RNAi -W1-7 plants exposed to either low (LL) or high light (HL).

205

206 **Supplemental Figure S3.** RT-qPCR analysis of target genes expression in wild type (WT)  
207 and transgenic RNAi -W1-7 plants exposed to either low light (LL).

208

209 **Supplemental Table 1.** List of microRNAs, their sequences, NCBI GEO accession numbers  
210 of barley Next Generation Sequencing results and references.

211

212 **Supplemental Table 2.** List of microRNA sequences, TaqMan™ MicroRNA assays and  
213 Northern probes used in the study.

214

215 **Supplemental Table 3.** Primer sequences used in the RT-qPCR of target mRNA levels.

216

217 **Supplemental Material and Methods S1.** A supplemental “Materials and Methods” section.

218

219 **Supplemental Material S2.** psRNA-Target analysis results.

220

221

222

223

224



## Parsed Citations

**Barciszewska-Pacak M, Milanowska K, Knop K, Bielewicz D, Nuc P, Plewka P, Pacak AM, Vazquez F, Karlowski W, Jarmolowski A, Szweykowska-Kulinska Z (2015) Arabidopsis microRNA expression regulation in a wide range of abiotic stress responses. Front Plant Sci 6: 410**

Pubmed: [Author and Title](#)

CrossRef: [Author and Title](#)

Google Scholar: [Author Only Title Only Author and Title](#)

**Chan KX, Phua SY, Crisp P, McQuinn R, Pogson BJ (2016) Learning the languages of the chloroplast: retrograde signaling and beyond. Ann Rev Plant Biol 67: 25-53**

Pubmed: [Author and Title](#)

CrossRef: [Author and Title](#)

Google Scholar: [Author Only Title Only Author and Title](#)

**Dai X, Zhao PX (2011) psRNATarget: a plant small RNA target analysis server. Nucl Ac Res (Web Server issue):W155-9**

Pubmed: [Author and Title](#)

CrossRef: [Author and Title](#)

Google Scholar: [Author Only Title Only Author and Title](#)

**Desveaux D, Despres C, Joyeux A, Subramaniam R, Brisson N (2000) PBF-2 is a novel single-stranded DNA binding factor implicated in PR-10a gene activation in potato. Plant Cell 12: 1477-1489**

Pubmed: [Author and Title](#)

CrossRef: [Author and Title](#)

Google Scholar: [Author Only Title Only Author and Title](#)

**Dietz K-J (2015) Efficient high light acclimation involves rapid processes at multiple mechanistic levels. J Exp Bot 66: 2401-2414**

Pubmed: [Author and Title](#)

CrossRef: [Author and Title](#)

Google Scholar: [Author Only Title Only Author and Title](#)

**Foyer CH, Karpinska B, Krupinska K (2014) The functions of WHIRLY1 and REDOX-RESPONSIVE TRANSCRIPTION FACTOR1 in cross tolerance responses in plants: a hypothesis. Phil Trans R Soc B 369: 20130226**

Pubmed: [Author and Title](#)

CrossRef: [Author and Title](#)

Google Scholar: [Author Only Title Only Author and Title](#)

**Grabowski E, Miao Y, Mulisch M, Krupinska K (2008) Single-stranded DNA binding protein Whirly1 in barley leaves is located in plastids and the nucleus of the same cell. Plant Physiol 147: 1800-1804**

Pubmed: [Author and Title](#)

CrossRef: [Author and Title](#)

Google Scholar: [Author Only Title Only Author and Title](#)

**Havaux M, Dall'Osto L, Bassi R (2007) Zeaxanthin has enhanced antioxidant capacity with respect to all other xanthophylls in Arabidopsis leaves and functions independent of binding to PSII antennae(1 C W). Plant Physiol 145: 1506-1520**

Pubmed: [Author and Title](#)

CrossRef: [Author and Title](#)

Google Scholar: [Author Only Title Only Author and Title](#)

**Kleine T, Leister D (2016) Retrograde signaling: organelles go networking. Biochim Biophys Acta 1857: 1313-1325**

Pubmed: [Author and Title](#)

CrossRef: [Author and Title](#)

Google Scholar: [Author Only Title Only Author and Title](#)

**Krieger-Liszka A, Trösch M, Krupinska K (2015) Generation of reactive oxygen species in thylakoids from senescing flag leaves of the barley varieties Lomerit and Carina. Planta 241: 1497-508**

Pubmed: [Author and Title](#)

CrossRef: [Author and Title](#)

Google Scholar: [Author Only Title Only Author and Title](#)

**Krupinska K, Oetke S, Desel C, Mulisch M, Schäfer A, Hollmann J, Kumlehn J, Hensel G (2014) WHIRLY1 is a major organizer of chloroplast nucleoids. Front Plant Sci 5: 432**

Pubmed: [Author and Title](#)

CrossRef: [Author and Title](#)

Google Scholar: [Author Only Title Only Author and Title](#)

**Kruszka K, Pieczynski M, Windels D, Bielewicz D, Jarmolowski A, Szweykowska-Kulinska Z, Vazquez F (2012) Role of microRNAs and other sRNAs of plants in their changing environments. J Plant Physiol 169:1664-72**

Pubmed: [Author and Title](#)

CrossRef: [Author and Title](#)

Google Scholar: [Author Only Title Only Author and Title](#)

**Kruszka K, Pacak A, Swida-Barteczka A, Nuc P, Alaba S, Wroblewska Z, Karlowski W, Jarmolowski A, Szweykowska-Kulinska Z (2014) Transcriptionally and post-transcriptionally regulated microRNAs in heat stress response in barley. J Exp Bot 65: 6123-35**

Pubmed: [Author and Title](#)  
CrossRef: [Author and Title](#)  
Google Scholar: [Author Only Title Only Author and Title](#)

**Li S, Castillo-González C, Yu B, Zhang X (2016) The functions of plant small RNAs in development and in stress responses. Plant J 90: 654-670**

Pubmed: [Author and Title](#)  
CrossRef: [Author and Title](#)  
Google Scholar: [Author Only Title Only Author and Title](#)

**Li Z, Wakao S, Fischer BB, Niyogi KK (2009) Sensing and responding to excess light. Ann Rev Plant Biol 60: 239-260**

Pubmed: [Author and Title](#)  
CrossRef: [Author and Title](#)  
Google Scholar: [Author Only Title Only Author and Title](#)

**Marèchal A, Parent J-S, Vèronneau-Lafortune, Joyeux A, Lang F, Brisson N (2009) Whirly proteins maintain genome stability in Arabidopsis. Proc Natl Ac Sci USA 106:14693-14698**

Pubmed: [Author and Title](#)  
CrossRef: [Author and Title](#)  
Google Scholar: [Author Only Title Only Author and Title](#)

**Melonek J, Mulisch M, Schmitz-Linneweber C, Grabowski E, Hensel G, Krupinska K (2010) Whirly1 in chloroplasts associates with intron containing RNAs and rarely co-localizes with nucleoids. Planta 232: 471-481**

Pubmed: [Author and Title](#)  
CrossRef: [Author and Title](#)  
Google Scholar: [Author Only Title Only Author and Title](#)

**Mubarakshina MM, Ivanov BN, Naydov IA, Hillier W, Badger MR, Krieger-Liszskay A (2010) Production and diffusion of chloroplastic H<sub>2</sub>O<sub>2</sub> and its implication to signaling. J Exp Bot 61: 3577-3587**

Pubmed: [Author and Title](#)  
CrossRef: [Author and Title](#)  
Google Scholar: [Author Only Title Only Author and Title](#)

**Pacak A, Kruszcza K, Swida-Bateczka A, Karlowski W, Jarmolowski A, Szweykowska-Kulinska Z (2016) Developmental changes in microRNA expression profiles coupled with miRNA target analysis. Acta Biochim Pol 63:799-809**

Pubmed: [Author and Title](#)  
CrossRef: [Author and Title](#)  
Google Scholar: [Author Only Title Only Author and Title](#)

**Pfalz J, Liebers M, Hirth M, Grubler B, Holtzegel U, Schroeter Y, Dietzel L, Pfannschmidt T (2012) Environmental control of nuclear gene expression by chloroplast redox signals. Front Plant Sci 3: 257**

Pubmed: [Author and Title](#)  
CrossRef: [Author and Title](#)  
Google Scholar: [Author Only Title Only Author and Title](#)

**Prikryl J, Watkins KP, Friso G, van Wijk KJ, Barkan A (2008) A member of the Whirly family is a multifunctional RNA- and DNA-binding protein that is essential for chloroplast biogenesis. Nucl Acids Res 36: 5152-5165**

Pubmed: [Author and Title](#)  
CrossRef: [Author and Title](#)  
Google Scholar: [Author Only Title Only Author and Title](#)

**Shao H, Wang H, Tang X (2015) NAC transcription factors in plant multiple abiotic stress responses: progress and prospects. Fron Plant Sci 6: 902**

Pubmed: [Author and Title](#)  
CrossRef: [Author and Title](#)  
Google Scholar: [Author Only Title Only Author and Title](#)

**Sunkar R, Li YF, Jagadeeswaran G (2012) Functions of microRNAs in plant stress responses. Trends Plant Sci 17:196-203**

Pubmed: [Author and Title](#)  
CrossRef: [Author and Title](#)  
Google Scholar: [Author Only Title Only Author and Title](#)

**Yoo HH, Kwon C, Lee MM, Chung IK (2007) Single-stranded DNA binding factor AtWHY1 modulates telomere length homeostasis in Arabidopsis. Plant J 49: 442-451**

Pubmed: [Author and Title](#)  
CrossRef: [Author and Title](#)  
Google Scholar: [Author Only Title Only Author and Title](#)
